# Supplementary material for: An isotope dilution-liquid chromatography-tandem mass spectrometry-based candidate reference measurement procedure for the quantification of mycophenolic acid glucuronide in human serum and plasma
Source: publisher site journal article supplement (doi:10.1515/cclm-2025-1052), 2025-11-07
Supplement: Supplementary file 3 [file j_cclm-2025-1052_suppl_003.docx]

**An isotope dilution-liquid chromatography-tandem mass spectrometry based candidate reference measurement procedure for the quantification of mycophenolic acid glucuronide in human serum and plasma**

**Short title:** An ID-LC-MS/MS-based candidate reference method for the quantification of MPAG

Tobias Schierschera, Janik Wilda, Neeraj Singhb, Martina Bachmannb, Julia Hoopa, Friederike Baulandc, Andrea Geistangerb, Lorenz Rischa, Christoph Segera, Judith Taibonb*

aDr. Risch Ostschweiz AG, Lagerstrasse 30, 9470 Buchs, Switzerland

bRoche Diagnostics GmbH, Nonnenwald 2, 82377 Penzberg, Germany

cChrestos Concept GmbH & Co. KG, Girardestaße 1–5, 45131 Essen, Germany

***Corresponding author: Judith Taibon, PhD**, Nonnenwald 2, 82377 Penzberg, Germany, Phone: +49 8856 6012941, E-Mail: [judith.taibon@roche.com](mailto:judith.taibon@roche.com)

**Estimation of measurement uncertainty**

Measurement uncertainty (MU) was determined according to the GUM [1] and based on Taibon et al. [2] and considered following the main steps: uncertainty estimation of qNMR target value assignment of reference material (I), uncertainty estimation of the preparation of calibrator materials (II) and the estimation of uncertainty of the LC-MS/MS method (III).

(I) qNMR measurements were performed in six replicates using an SI traceable ISTD for the quantification of the absolute content (*Px*, purity of the analyte given as mass fraction) of the analyte. For the estimation of uncertainty, the following simplified equation was used ***equation (1)*:**

Uncertainty components of weighing, measuring and integrating are included as type A uncertainties in the qNMR measurements. Purity (*Pstd)* and uncertainty (*uncPstd)* of the ISTD are combined with the mean (*A*) and the uncertainty (*uncA)* of qNMR measurements to give the uncertainty of the purity of the reference material *unc*(*Px*) using the following ***equation (2)*:**

(II) A bottom up approach was used to estimate the MU related to the serum based calibration material *unc(cal)* includingfollowing uncertainty components: purity of the reference material, weighing, preparation of stock solution and dilutions, preparation of spike solution and preparation of matrix based calibrator level. Uncertainties of the laboratory equipment used, such as ultra-micro balance, pipettes and volumetric flasks, were provided by the manufacturer.

***Propagation of uncertainty***

Analyte concentration *C* [µg/mL] of the matrix based calibrator levels was calculated using the following ***equations (3a and 3b)***:

***(3a)***

***(3b)***

where *M* is the weighted mass, *P* is the purity, *Vflask* is the volume of the volumetric flask, while *Vstock Vdilution,* *Vspike* and *Vserum* are pipetted volumes.

Generally, uncertainties are combined by the rules of error propagation. Let y = f(x). The uncertainty of y is approximated by the propagation of uncertainty using the following equation ***(4)***

as long as all components xi are not correlated to each other.

Therefore, considering ***equation*** ***(3a and 3b)*** and applying ***equation*** ***(4)*** for each individual step (preparation of stock solution, dilution of stock solution and spike solution), final measurement uncertainty of matrix-based calibrator levels was determined using the following ***equation (5)***:

where C*h* and unc*Ch* is the analyte concentration and uncertainty of the spike solution, V*h* and unc*Vh* the volume and uncertainty of the pipetted spike solution, V*j* and unc*Vj* the added volume and uncertainty of the pipetted calibrator matrix.

(III) Estimation of total variability of the LC-MS/MS method was performed using a precision experiment (type A uncertainty) and considered the following steps: sample preparation of calibrators, preparation of internal standard, preparation of samples, measurement of calibrators, generation of the calibration curve and measurement and evaluation of sample results. As described above, precision was evaluated performing a multi-day validation experiment and variability components were determined using an ANOVA based variance-components analysis. Uncertainties from precision experiment (*uncprec*) were expressed as standard deviation (SD).

The measurement uncertainty of the whole approach for a single measurement (n=1) was estimated as a combination of the uncertainty of calibrator preparation (unc*cal*) and calculated uncertainty of the precision experiment (unc*prec*) based on ***equation (6)***:

To avoid error underestimation, for each individual sample concentration level, unc*cal* of the calibrator level with the higher uncertainty was chosen for this combination of uncertainties. The derived uncertainty was multiplied by a coverage factor of k = 2, which corresponds to an approximate confidence level of 95% assuming a normal distribution, to obtain an expanded uncertainty.

For the assignment of reference or target values, multiple sample preparations for each sample were performed on at least two different days and the result was calculated as the arithmetic mean (n = x). Measurement uncertainty was calculated as combined uncertainty of the calibrator preparation (unc*cal*) and uncertainty (SD) of the mean of measurement results (unc*mean*), as given by the following ***equation (7)***:

To avoid underestimating error, the highest uncertainty (*unccal*) of the two closest calibration levels was chosen for each sample concentration level when combining uncertainties. The derived uncertainty was multiplied by a coverage factor of k = 2, which corresponds to an approximate confidence level of 95% assuming a normal distribution, to obtain an expanded uncertainty.

**References**

1. Joint Committee for Guides in Metrology. Evaluation of measurement data – Guide to the expression of uncertainty in measurement, GUM 1995 with minor corrections. Available from: https://www.bipm.org/documents/20126/2071204/JCGM_100_2008_E.pdf/cb0ef43f-baa5-11cf-3f85-4dcd86f77bd6?version=1.10&t=1659082531978&download=true [Accessed 22 Sep 2022].
2. Taibon J, Santner T, Singh N, Ibrahim S, Babitzki G, Köppl D, et al. An isotope dilution-liquid chromatography-tandem mass spectrometry (ID-LC-MS/MS)-based candidate reference measurement procedure (RMP) for the quantification of aldosterone in human serum and plasma. Clinical Chemistry and Laboratory Medicine (CCLM). 2023;61: 1902-1916. https://doi.org/10.1515/cclm-2022-0996
